# Supplementary material
Source: HighWire-hosted journal article supplement (https://cmaj.ca/highwire/filestream/69900/field_highwire_adjunct_files/0/171430-guide-1-at.pdf)
Supplement: 171430-guide-1-at.pdf [file 171430-guide-1-at.pdf]

## Appendix 1 (as supplied by the authors): Visual Acuity Guideline March 22, 2018

### Analytic Framework

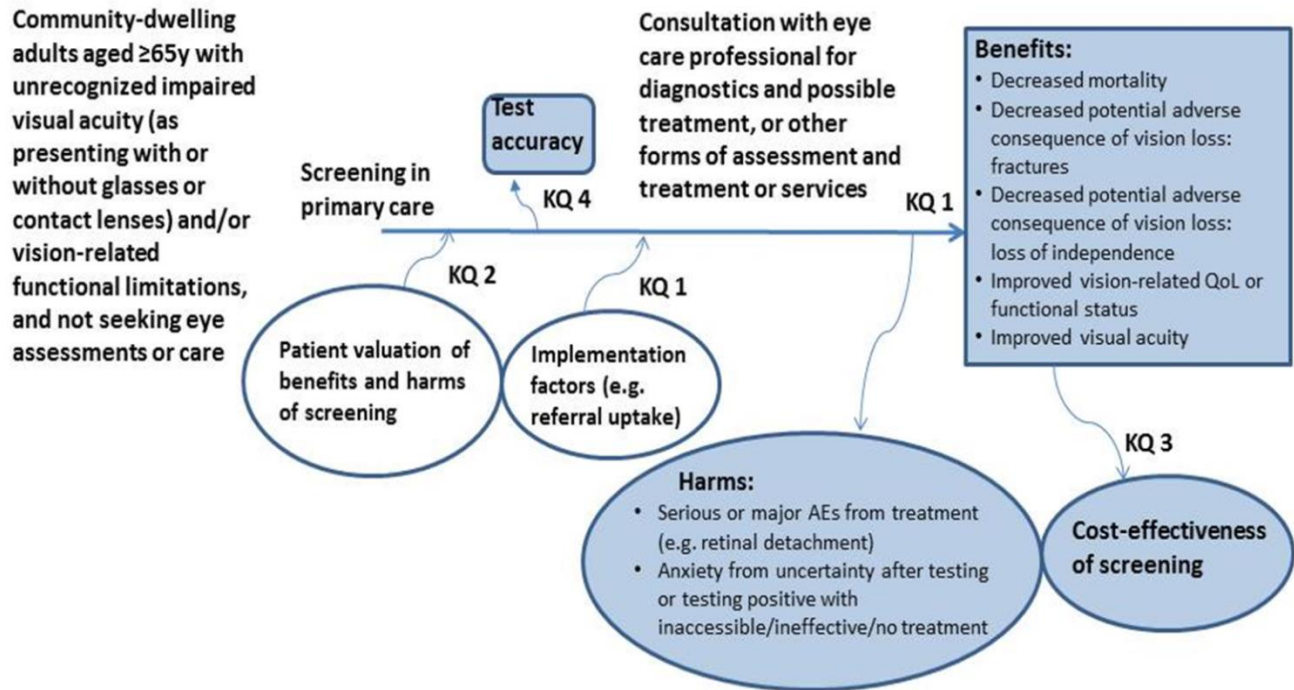

### Research Questions

#### Stage 1a

KQ1. What are the benefits and harms of screening compared with no screening for unrecognized\* impaired visual acuity or vision-related functional limitations in community-dwelling adults  $\geq 65$  years of age?

#### Stage 1b

KQ2: (a) How do community-dwelling adults  $\geq 65$  years of age weigh the benefits and harms of screening for impaired visual acuity or vision-related functional limitations, and (b) how do these values inform their acceptance or decisions to undergo screening?

KQ3: What is the cost-effectiveness of screening for unrecognized impaired visual acuity or vision-related functional limitations in community-dwelling adults  $\geq 65$  years of age?

#### Stage 2

KQ4: What is the accuracy of screening tests commonly used in primary care settings for impaired visual acuity or vision-related functional limitations?

\* By unrecognized we include people that may have symptoms but have not brought them to medical attention, or do not recognize they have a vision-related dysfunction; they will typically not have actively sought eye assessment or care.
